# Supplementary material for: Lifestyle of sponge symbiont phages by host prediction and correlative microscopy
Source: Springer Nature journal article supplement (doi:10.1038/s41396-021-00900-6), 2021-02-18
Supplement: MOESM1 [file 41396_2021_900_MOESM1_ESM.pdf]

# Lifestyle of sponge symbiont phages by host prediction and correlative microscopy

Jahn M.T.<sup>1,2,&</sup>, Lachnit T.<sup>3</sup>, Markert S.M.<sup>4</sup>, Stigloher C.<sup>4</sup>, Pita L.<sup>1</sup>, Ribes M.<sup>5</sup>, Dutilh B.E.<sup>6</sup> & Hentschel U.<sup>1,3</sup>

<sup>1</sup>GEOMAR Helmholtz Centre for Ocean Research Kiel, Kiel, Germany

<sup>2</sup>Current address: Department of Zoology and Department of Biochemistry, University of Oxford, Oxford, UK

<sup>3</sup>Christian-Albrechts-University of Kiel, Kiel, Germany

<sup>4</sup>Imaging Core Facility, Biocenter, University of Würzburg, Würzburg, Germany

<sup>5</sup>Institut de Ciències del Mar (ICM-CSIC), Barcelona, Spain

<sup>6</sup>Theoretical Biology and Bioinformatics, Utrecht University, Utrecht, The Netherlands

& Correspondence: [martin.jahn@zoo.ox.ac.uk](mailto:martin.jahn@zoo.ox.ac.uk)

Supplementary Information

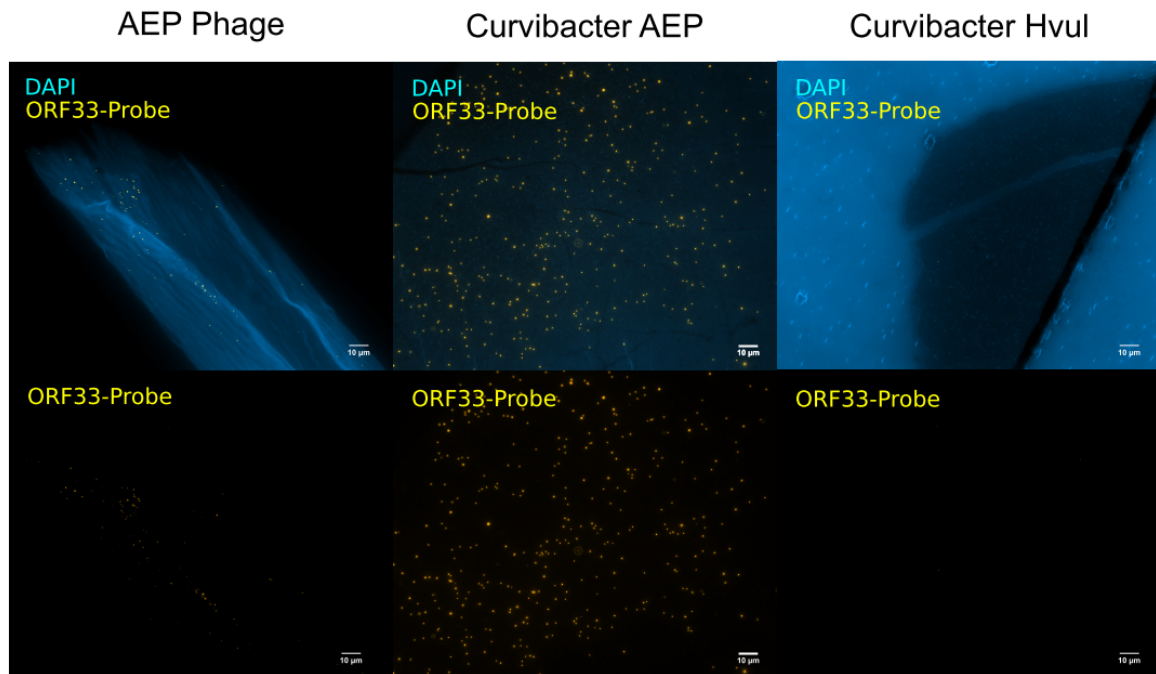

**Figure S1: Branched-DNA fluorescence *in situ* hybridization system testing.** Multiple probes (Cy3, yellow, see methods) targeting Curvibacter AEP ORF33 encoding the major capsid protein (VOG1887) were applied to purified Curvibacter AEP virions attached to a fibre matrix (blue autofluorescence), Curvibacter AEP (lysogens), Curvibacter Hvul (non lysogen) sharing 95.4% ANI.

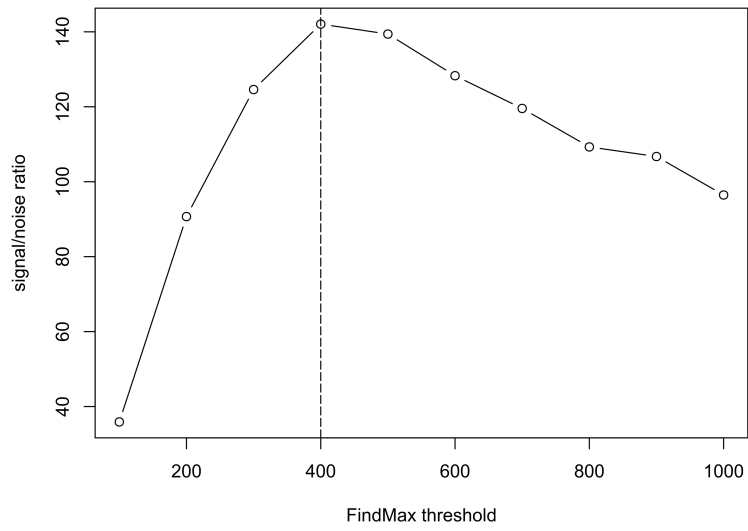

**Figure S2: Optimizing “signal-to-noise” ratios for automatic signal detection.** Impact of successive changes of ImageJ-FindMax threshold on positive:negative control ratio. A threshold of 400 units allowed a maximal signal, as indicated by the dashed line.

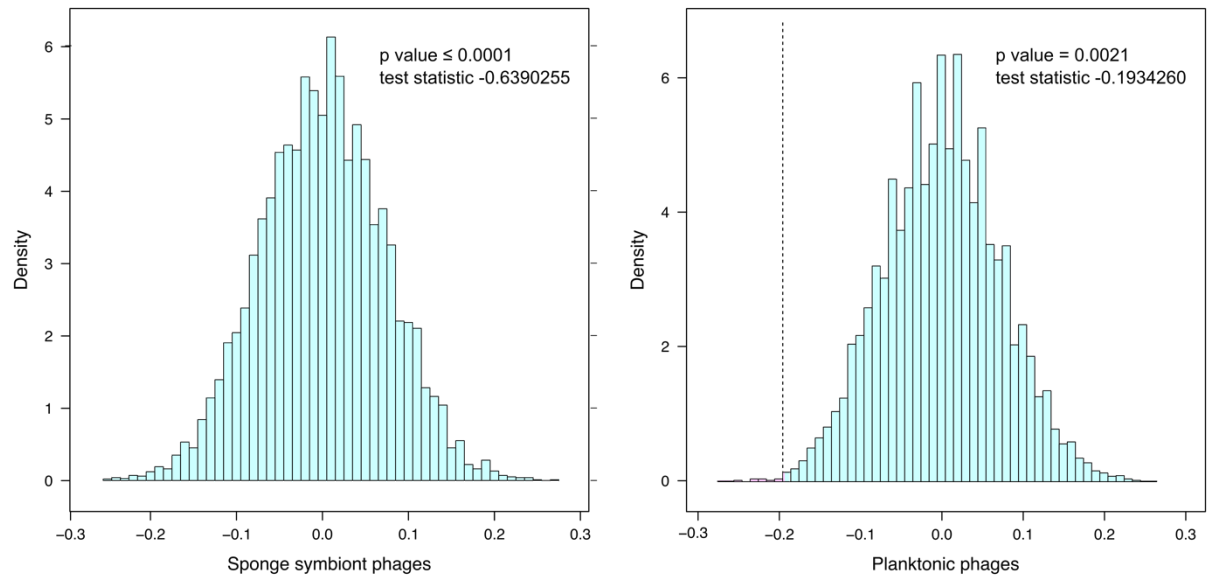

**Figure S3. Comparison of the test statistics for symbiont phages and planktophages against randomised networks.** To infer significant stratification of phage-bacteria pairings between sponge associated and the planktonic environment the complete network was compared to  $N=10,000$  networks where labels were randomised using a custom script. Related to Figure 1.

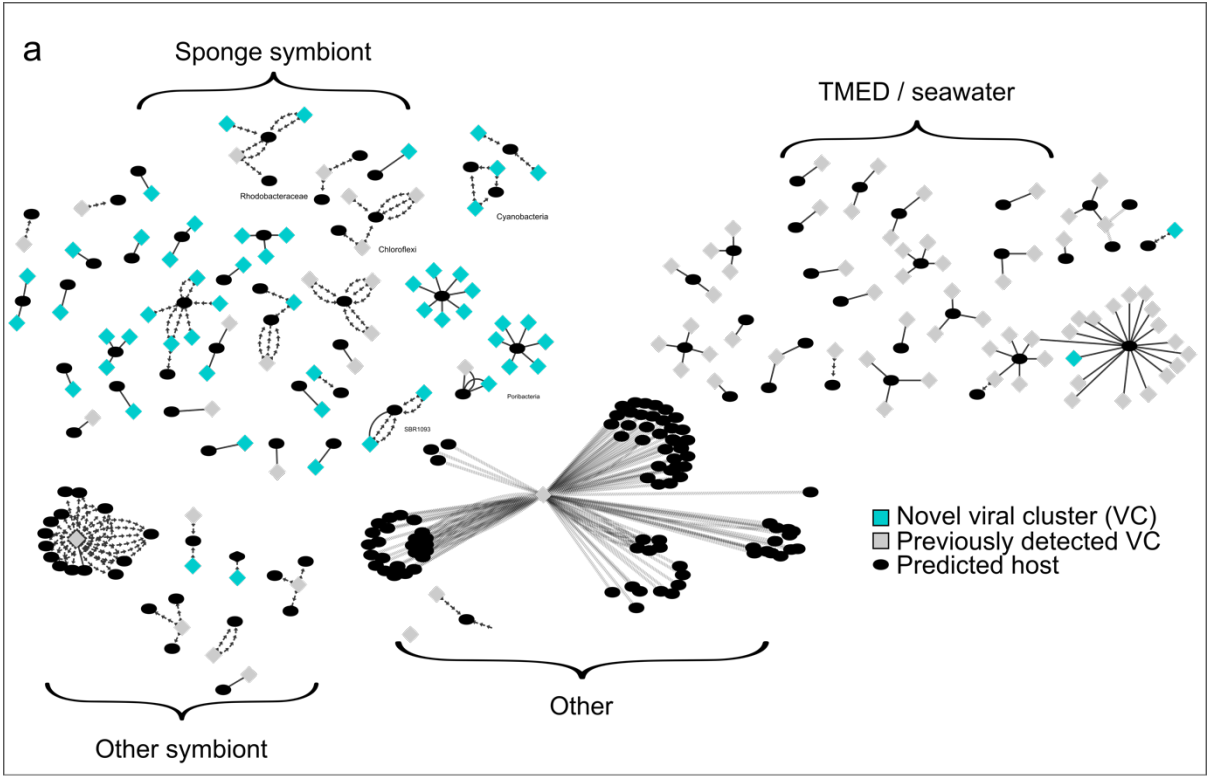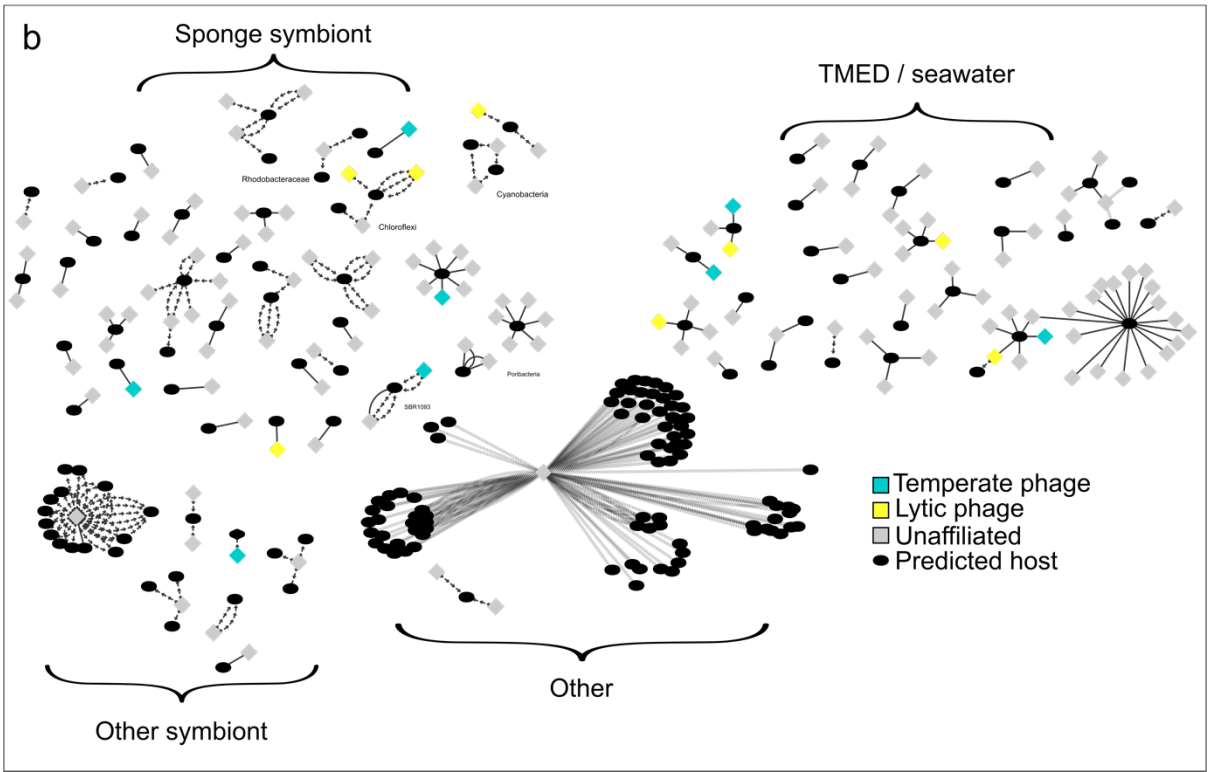

**Figure S4: Full phage-bacteria infection network** providing additional information on phage (a) taxonomic novelty and (b) predicted replication strategy.



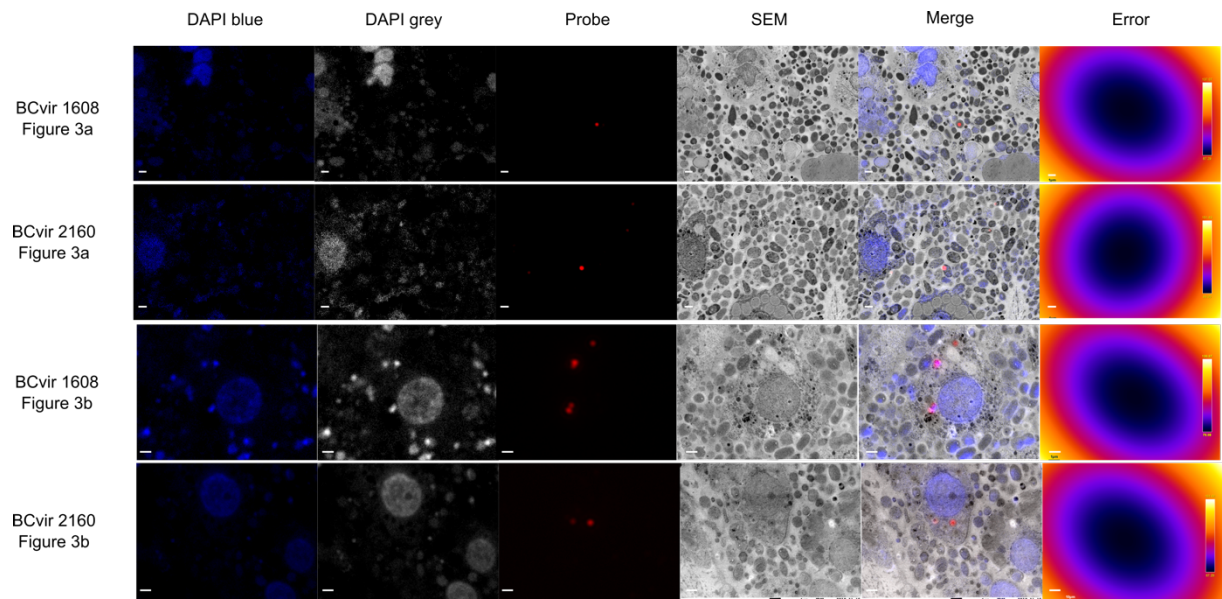

**Figure S6 Separate channels and predicted error map of set correlation for Fig. 3.** Error indicates the registration error maps generated by eC-CLEM and shows the distribution of predicted alignment error for rigid set correlation (fluorescence versus scanning electron microscopy). Colour scale indicates the predicted deviation in nm. Scale bars 1  $\mu$ m.

**Table S1.** Sampling metadata.

| <b>species</b>       | <b>used for</b> | <b>location</b>                                                   | <b>date</b>           | <b>time</b> | <b>temperature</b> | <b>depth</b> | <b>lat</b>        | <b>long</b>      |
|----------------------|-----------------|-------------------------------------------------------------------|-----------------------|-------------|--------------------|--------------|-------------------|------------------|
| <i>A. aerophoba</i>  | microscopy      | cala<br>d'Aiguafre<br>da                                          | 4.<br>October<br>2016 | noon        | 21°C               | 3m           | 41°57'5<br>1.3"N  | 3°13'3<br>9.8"E  |
| <i>A. aerophoba</i>  | virome          | Port Lligat                                                       | 12. July<br>2016      | noon        | 23.3°C             | 3m           | 42°17'5<br>0.8"N  | 3°17'2<br>0.4"E  |
| <i>P. ficiformis</i> | virome          | Reserva<br>Natural de<br>Montgrí,<br>Illes<br>Medes i<br>Baix Ter | 18. July<br>2016      | noon        | 21°C               | 15m          | 42°04'5<br>6.97"N | 3°12'0<br>0.09"E |
| <i>C. reniformis</i> | virome          | Reserva<br>Natural de<br>Montgrí,<br>Illes<br>Medes i<br>Baix Ter | 18. July<br>2016      | noon        | 21°C               | 15m          | 42°04'5<br>6.97"N | 3°12'0<br>0.09"E |
| <i>A. oroides</i>    | virome          | Reserva<br>Natural de<br>Montgrí,<br>Illes<br>Medes i<br>Baix Ter | 18. July<br>2016      | noon        | 21°C               | 15m          | 42°04'5<br>6.97"N | 3°12'0<br>0.09"E |



**Table S3.** Kruskal–Wallis test followed by Dunn’s Post hoc-Tests with Benjamini-Hochberg false discovery rate correction.

| <b>pairwise comparisons</b>    | <b>Z statistic (adjusted p value)</b> |
|--------------------------------|---------------------------------------|
| BC_1608 - BC_2142              | 0.141592 (0.4437)                     |
| BC_1608 - BC_2160              | -0.161975 (0.4841)                    |
| BC_2142 - BC_2160              | -0.265500 (0.4941)                    |
| BC_1608 - neg_control          | 3.665383 (0.0002)*                    |
| BC_2142 - neg_control          | 3.324442 (0.0006)*                    |
| BC_2160 - neg_control          | 3.350797 (0.0007)*                    |
| BC_1608 - pos_control          | -7.922506 (0.0000)*                   |
| BC_2142 - pos_control          | -7.421882 (0.0000)*                   |
| BC_2160 - pos_control          | -6.666282 (0.0000)*                   |
| neg_control - pos_control      | -9.349236 (0.0000)*                   |
| alpha = 0.05                   |                                       |
| Reject Ho if $p \leq \alpha/2$ |                                       |

**Table S4.** Kruskal–Wallis tests, pairwise tissue comparison.

| <b>pairwise comparisons</b>   | <b>chi-squared</b> | <b>df</b> | <b>p-value</b> |
|-------------------------------|--------------------|-----------|----------------|
| BC_1608: mesohyl - pinacoderm | 0.24758            | 1         | 0.6188         |
| BC_2142: mesohyl - pinacoderm | 0.58098            | 1         | 0.4459         |
| BC_2160: mesohyl - pinacoderm | 1.1738             | 1         | 0.2786         |
